# Supplementary material for: Exosome-mediated transfer of MIF confers temozolomide resistance by regulating TIMP3/PI3K/AKT axis in gliomas
Source: PubMed Central journal article supplement — Mol Ther Oncolytics. 2021 Aug 19;22:114–28. doi: 10.1016/j.omto.2021.08.004 (PMC8413833; doi:10.1016/j.omto.2021.08.004), 2021-08-19
Supplement: mmc1.pdf [file mmc1.pdf]

OMTO, Volume 22

## **Supplemental information**

### **Exosome-mediated transfer of MIF confers temozolomide resistance by regulating TIMP3/PI3K/AKT axis in gliomas**

**Q.T. Wei, B.Y. Liu, H.Y. Ji, Y.F. Lan, W.H. Tang, J. Zhou, X.Y. Zhong, C.L. Lian, Q.Z. Huang, C.Y. Wang, Y.M. Xu, and H.B. Guo**

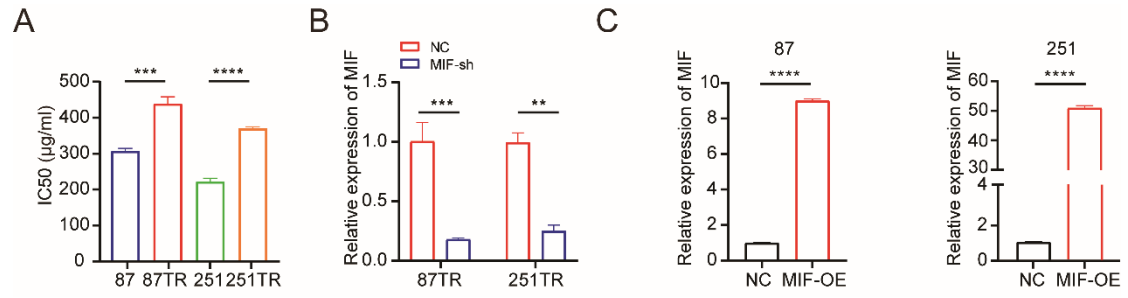

**Figure S1. TR cells were verified and the efficiency of MIF knockout or overexpress was confirmed.** (A) The IC50 value of TR cells verified by CCK8 was significantly higher than that of TS cells. (B) RT-qPCR confirmed the low efficiency of MIF knockout in TR cells. (C) RT-qPCR confirmed the high efficiency of MIF overexpression in TS cells.

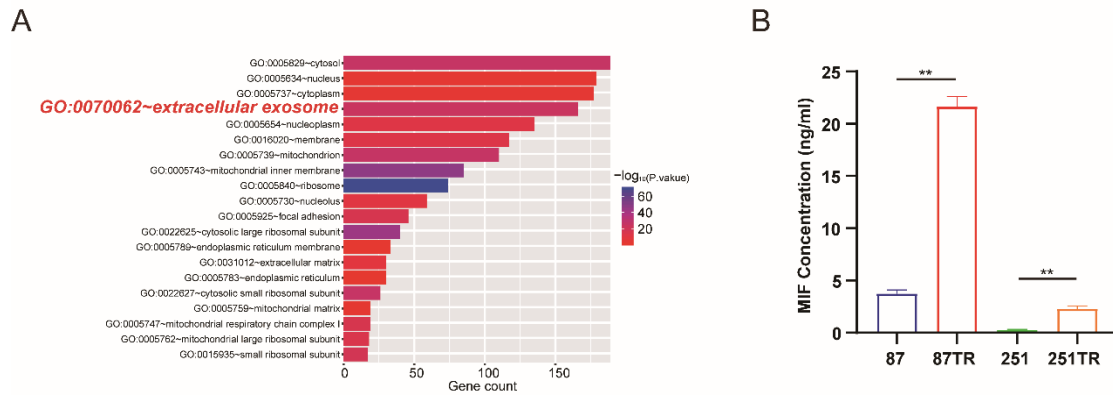

**Figure S2. MIF was validated to be related to exosomes.** (A) Differential expressed genes (DEGs) analysis of MIF in TCGA database showed the DEGs were enriched in extracellular exosome. (B) ELISA results for MIF expression in cell culture supernatant. Cells,  $2 \times 10^5$  each, were cultured in 2ml medium for 48 hours. The culture supernatants were assessed by ELISA for MIF.

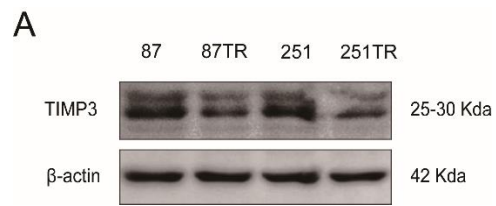

**Figure S3. TIMP3 was significantly down-regulated in TR cells.** (A) Western blot analysis showed that TIMP3 was significantly down-regulated in TR cells compared to homologous TS cells.

Supplementary Table S1: The primers used in RT-qPCR analysis in glioma cells.

| <b>mRNA</b> | <b>Forward primer</b>  | <b>Reverse primer</b> |
|-------------|------------------------|-----------------------|
| MIF         | CGGACAGGGTCTACATCAA    | CTTAGGCGAAGGTGGAGTT   |
| TIMP3       | CATGTGCAGTACATCCATACGG | CATCATAGACGCGACCTGTCA |
| GAPDH       | CAATGACCCCTTCATTGACC   | GACAAGCTTCCCGTTCTCAG  |

Supplementary Table S2: Information on antibodies used in glioma cells.

| Reagent              | Source                    | Identifier |
|----------------------|---------------------------|------------|
| Anti-MIF             | Novus Biologicals         | NBP1-81832 |
| Anti-TIMP3           | Abcam                     | ab39184    |
| Anti-PI3K            | Abcam                     | ab151549   |
| Anti-CD81            | Abcam                     | ab219209   |
| Anti-TSG101          | Abcam                     | ab125011   |
| Anti-ALIX            | Abcam                     | ab186429   |
| Anti-Caspase-3       | Cell Signaling Technology | Cat#9662   |
| Anti-Caspase-9       | Cell Signaling Technology | Cat#9508   |
| Anti-P-c-Raf         | Cell Signaling Technology | Cat#9421   |
| Anti-AKT             | Cell Signaling Technology | Cat#4691   |
| Anti-P-Akt (Ser473)  | Cell Signaling Technology | Cat #4060  |
| Anti-P-Akt (Thr308)  | Cell Signaling Technology | Cat #13038 |
| Anti- $\beta$ -actin | Cell Signaling Technology | Cat#4970   |
| Anti-BAX             | Bioss ANTIBODIES          | bsm-33279M |
| Anti-P21             | Proteintech               | 10355-1-AP |
| Anti-CDK2            | ImmunoWay                 | YT0832     |
| Anti-Cyclin H        | ZenBio Science            | 200542-1A7 |
